# Supplementary material
Source: publisher figshare collection journal article supplement (https://acs.figshare.com/ndownloader/files/7645663)
Supplement: Supplementary file 1 [file 7645663]

## Supporting Information

### How Well Do We Know the Future of CO<sub>2</sub> Emissions? Projecting Fleet Emissions from Light Duty Vehicle Technology Drivers

Niall P D Martin<sup>1</sup>, Justin D K Bishop<sup>1</sup>, and Adam M Boies<sup>1,2\*</sup>

<sup>1</sup>Energy Efficient Cities Initiative, University of Cambridge Department of Engineering, Trumpington Street, Cambridge CB2 1PZ, United Kingdom

<sup>2</sup>Department of Civil, Environmental or Geo-Engineering, University of Minnesota, Minneapolis, MN 55455-0116, USA

\*Corresponding author ([a.boies@eng.cam.ac.uk](mailto:a.boies@eng.cam.ac.uk), +44 1223 746 972)

#### Appendix A

EV and PHEV sales were first compared from 2001-2013, where the adoption of the former system was shown to have occurred at a faster rate. This result was established after the logistic sales function of Equation 1 was fit to historical UK vehicle registration data in Appendix A.1, from which EV and PHEV sales were correspondingly estimated to have increased by 216% and 201% per annum since 2001, respectively. Whilst statistically-significant regressions were derived for both technologies, discontinuities in vehicle sales functions were also noted that were attributed to the economic recession between 2008-2010.

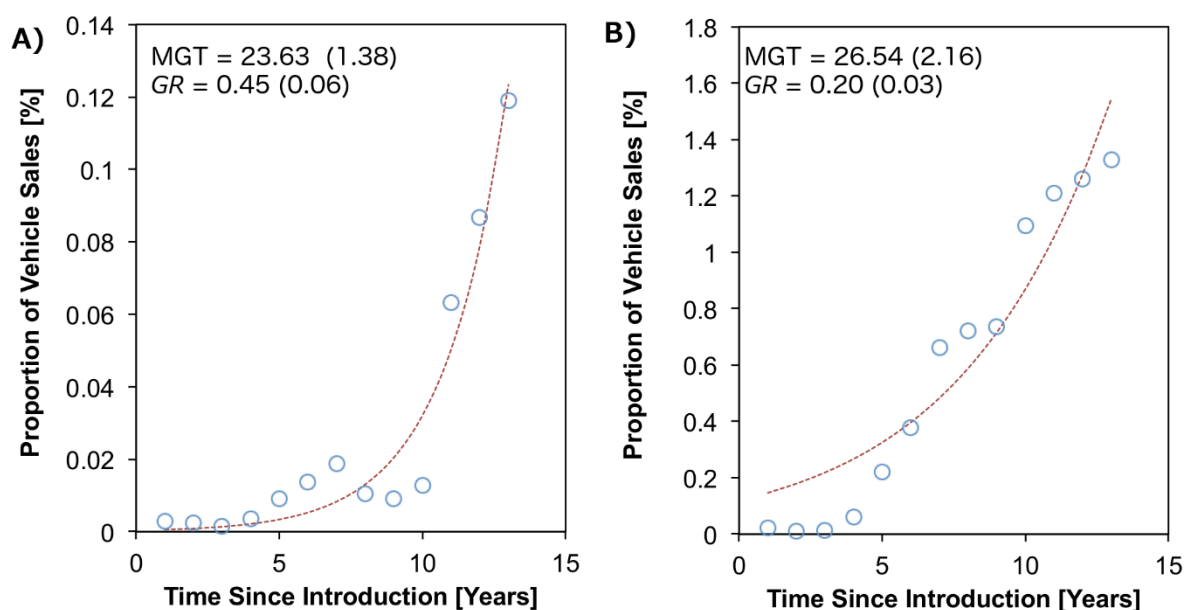

Figure S1: Least-squares logistic regression functions (broken line) for EV's (A) and PHEV's (B) based on sales data (blue circles) from 2001-2013. Standard errors for *MGT* and *GR* parameters shown in brackets.

## Appendix B

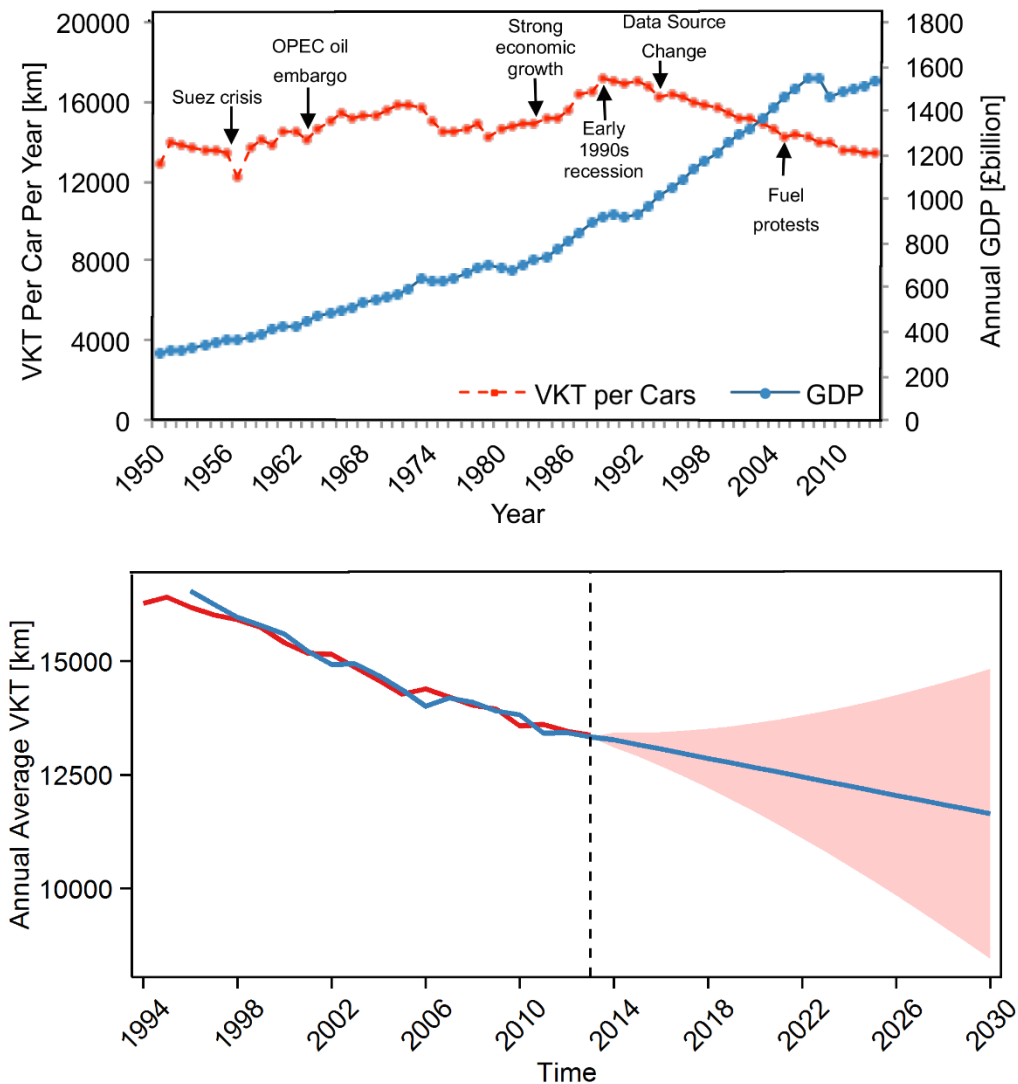

Figure S2: Average UK passenger vehicle activity, measured for historic (top) and future (bottom) VKT. Holt Forecasts are used to project annual average VKT, with 95% prediction interval about the mean. Red are blue regression lines represented the known data and Holt models, respectively. VKT increased by 12% between 1985 and 1990, when GDP was 1.3% above the historic national average of 2.6%. Similarly, VKT declined by 4.4% between the 1990 to 1994 recession when the annual average GDP growth was 0.6%<sup>1</sup>.

## Appendix C

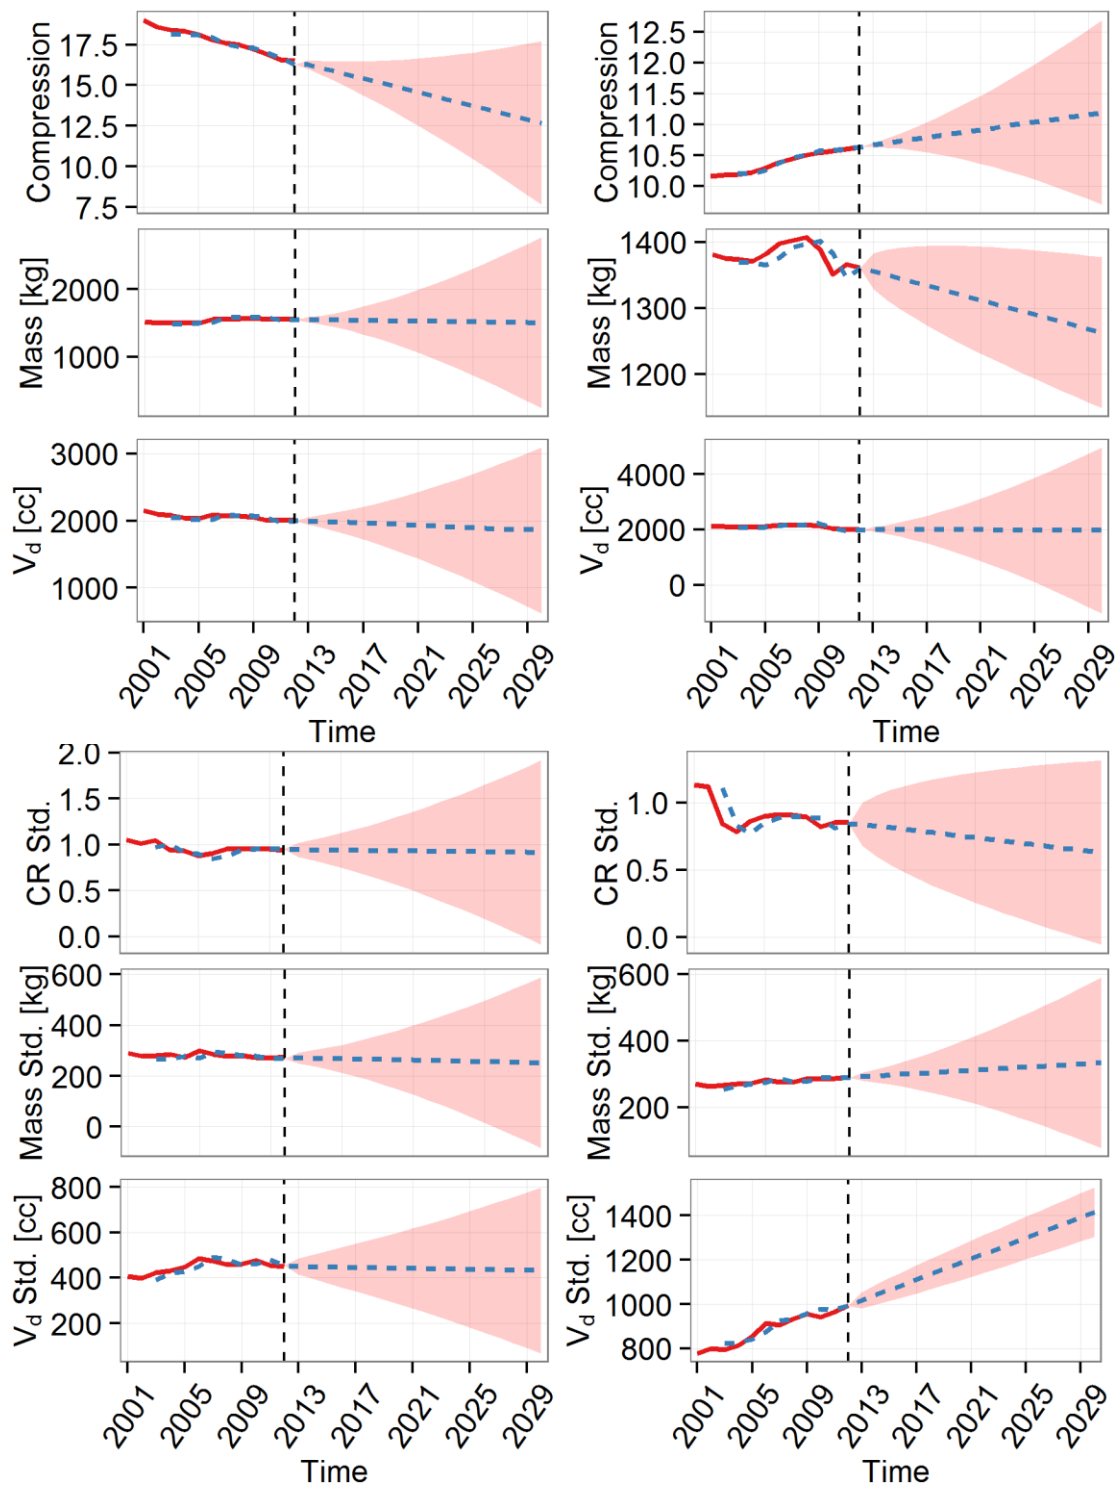

Figure S3: Holt exponential smoothing projections (blue dashed line) for the mean (top) and standard deviation (bottom) of CI (left) and SI (right) mass, engine size and compression ratio, with a 90% prediction interval about the mean (red shading).

## Appendix D

Table S1: STEM sales projection by propulsion system in 2030.

| Scenarios    | Mean SI<br>(StDev.)<br>[%] | Mean CI<br>(StDev.)<br>[%] | Mean EV<br>(StDev.)<br>[%] | Mean PHEV<br>(StDev.)<br>[%] |
|--------------|----------------------------|----------------------------|----------------------------|------------------------------|
| Baseline     | 22.76<br>0.47              | 61.84<br>1.27              | 3.39<br>0.16               | 12.00<br>1.73                |
| High CI      | 22.76<br>0.47              | 61.84<br>1.28              | 3.39<br>0.16               | 12.01<br>1.74                |
| High EV      | 16.27<br>1.08              | 44.22<br>2.94              | 11.89<br>0.55              | 27.61<br>3.99                |
| High CI & EV | 16.27<br>1.09              | 44.22<br>2.96              | 11.89<br>0.54              | 27.62<br>4.00                |

Table S2: STEM stock projection by propulsion system in 2030.

| Scenarios    | Mean SI<br>(StDev.)<br>[%] | Mean CI<br>(StDev.)<br>[%] | Mean EV<br>(StDev.)<br>[%] | Mean PHEV<br>(StDev.)<br>[%] |
|--------------|----------------------------|----------------------------|----------------------------|------------------------------|
| Baseline     | 31.66<br>0.13              | 60.64<br>0.31              | 1.59<br>0.10               | 6.11<br>0.42                 |
| High CI      | 28.81<br>0.12              | 63.48<br>0.31              | 1.59<br>0.10               | 6.11<br>0.42                 |
| High EV      | 28.21<br>0.30              | 52.22<br>0.72              | 5.57<br>0.34               | 13.99<br>0.97                |
| High CI & EV | 25.56<br>0.28              | 54.88<br>0.74              | 5.57<br>0.34               | 13.99<br>0.97                |

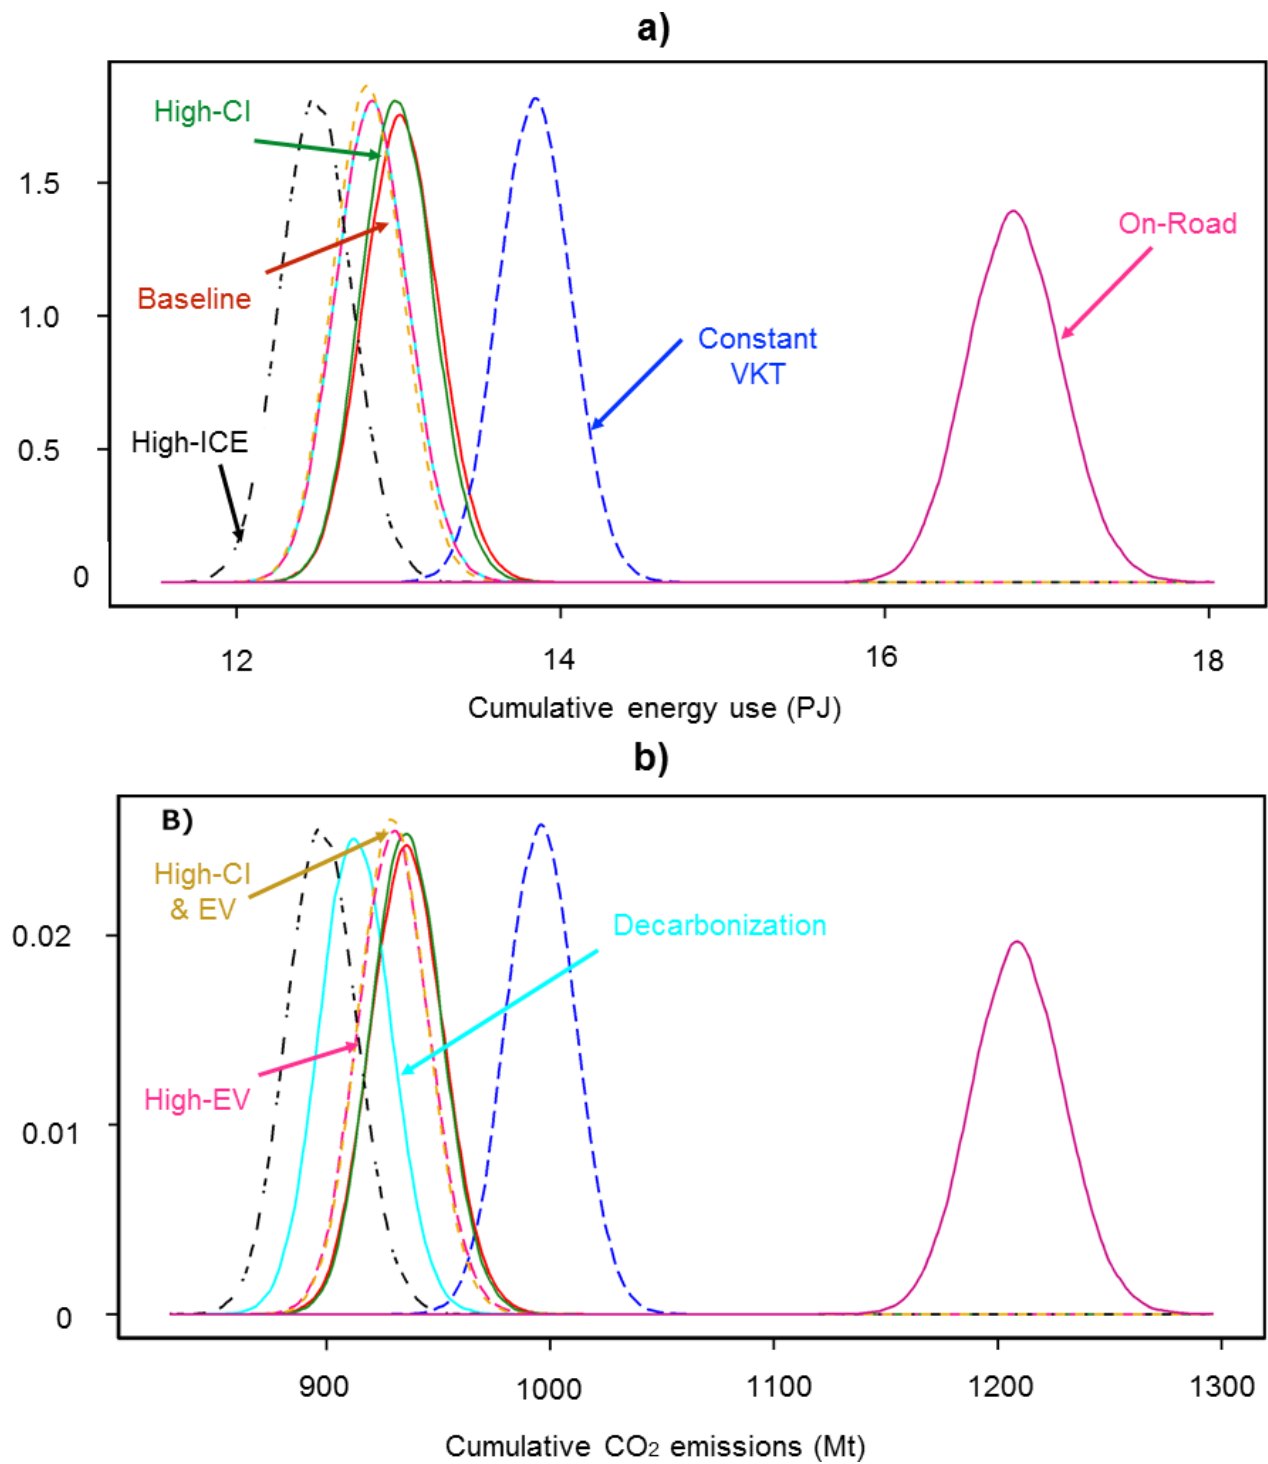

Figure S4: Comparison between cumulative (A) energy-use and (B) emissions over all propulsion systems, by scenario. Results calculated by summing over all propulsion systems by model and calendar year.

## Appendix F

### Sales-weighted versus average fuel consumption

The relationship between the fuel consumption of available vehicles and sales-weighted fuel consumption shown in Figure F3, where the linear trend from 1997 to 2011 indicates a consistency in consumer preference. Consumers selected more efficient vehicles than the available average as the mean sales-weighted fuel consumption was 4% and 7% lower for SI and CI vehicles than the mean of available vehicle fuel consumption. Clustering of CI data around 6.2 L/100 km denotes the only exception to this trend. CI vehicle manufacturers increasingly prioritised adherence to Euro 4 and 5 air-quality emissions standards during this period (2002-2008), at the expense of fuel efficiency improvements<sup>54</sup>. This resulted in the sales-weighted fuel consumption of CI vehicles decreasing by just 0.21 L/100 km between 2002-2008, compared to 0.92 L/100 km for SI. Cumulative reductions in fuel consumption between 1997-2011 were similar for both technologies, in spite of the CI stagnation period, as SI and CI sales-weighted values decreased by 27% and 26% respectively<sup>3</sup> and the average available fuel consumption decreased by 22% (SI) and 19% (CI)<sup>6</sup>

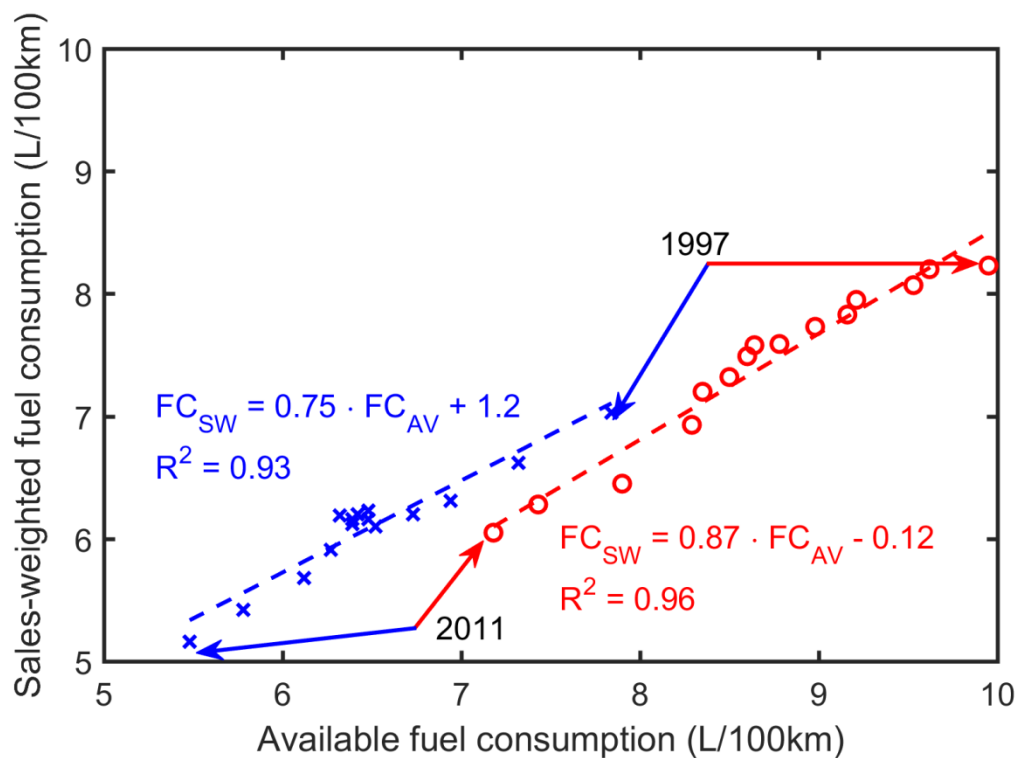

Figure S5: Regression for sales weighted NEDC fuel consumption ( $FC_{SW}$ ) against available vehicle NEDC fuel consumption ( $FC_{AV}$ ) from 1997 (top right in each regression) to 2011 (bottom left in each regression) for SI (red) and CI (blue) vehicles<sup>2,3</sup>. The slope represents the rate of change between both estimates.

### References

- (1) ONS, Gross Domestic Product (GDP). *Office for National Statistics*, **2016**.
- (2) DfT. Vehicle licensing statistics: 2015. *Department for Transport*, **2016**
- (3) CAP. CAP Vehicle Data. *CAP*, **2015**
